# Supplementary material
Source: HighWire-hosted journal article supplement (http://dmd.aspetjournals.org/highwire/filestream/70750/field_highwire_adjunct_files/0/Supplemental_79491.pdf)

**IDENTIFICATION OF INTESTINAL UDP-GLUCURONOSYLTRANSFERASE INHIBITORS IN GREEN TEA  
(*CAMELLIA SINENSIS*) USING A BIOCHEMOMETRIC APPROACH: APPLICATION TO RALOXIFENE AS  
A TEST DRUG VIA IN VITRO TO IN VIVO EXTRAPOLATION**

Dan-Dan Tian, Joshua J. Kellogg, Neşe Okut, Nicholas H. Oberlies, Nadja B. Cech, Danny D.  
Shen, Jeannine S. McCune, and Mary F. Paine

DRUG METABOLISM AND DISPOSITION

## SUPPLEMENTARY INFORMATION

**Fig. S1.** Concentration-dependent inhibition of intestinal microsomal UGT activity (4-MU glucuronidation) by purified catechins. Methanol (2%, v/v) served as vehicle control. Nicardipine (400  $\mu$ M) and silybin B (100  $\mu$ M) served as positive control UGT inhibitors ([Gufford, 2014](#)). All catechins were tested at 100  $\mu$ M. Bars and error bars denote mean  $\pm$  SD, respectively, of triplicate incubations.

**Fig. S2.** Dixon plots showing inhibition of raloxifene-4'-glucuronide (R4G; left) or raloxifene-6-glucuronide (R6G; right) formation by ECG (upper) and EGCG (lower). Symbols denote individual data points of duplicate incubations.

**Fig. S3.** Concentration-dependent inhibition of intestinal microsomal UGT activity (raloxifene glucuronidation) by purified catechins. Methanol (2%, v/v) served as vehicle control. Nicardipine (400  $\mu$ M) and silybin B (100  $\mu$ M) served as positive control UGT inhibitors ([Gufford et al., 2014](#)). All catechins were tested at 10 and 100  $\mu$ M. Bars and error bars denote mean  $\pm$  SD, respectively, of triplicate incubations. R4G, raloxifene 4'-glucuronide; R6G, raloxifene 6-glucuronide.

## Supplementary Reference

Gufford BT, Chen G, Lazarus P, Graf TN, Oberlies NH and Paine MF (2014) Identification of diet-derived constituents as potent inhibitors of intestinal glucuronidation. *Drug Metab Dispos* 42:1675-1683

Fig. S1

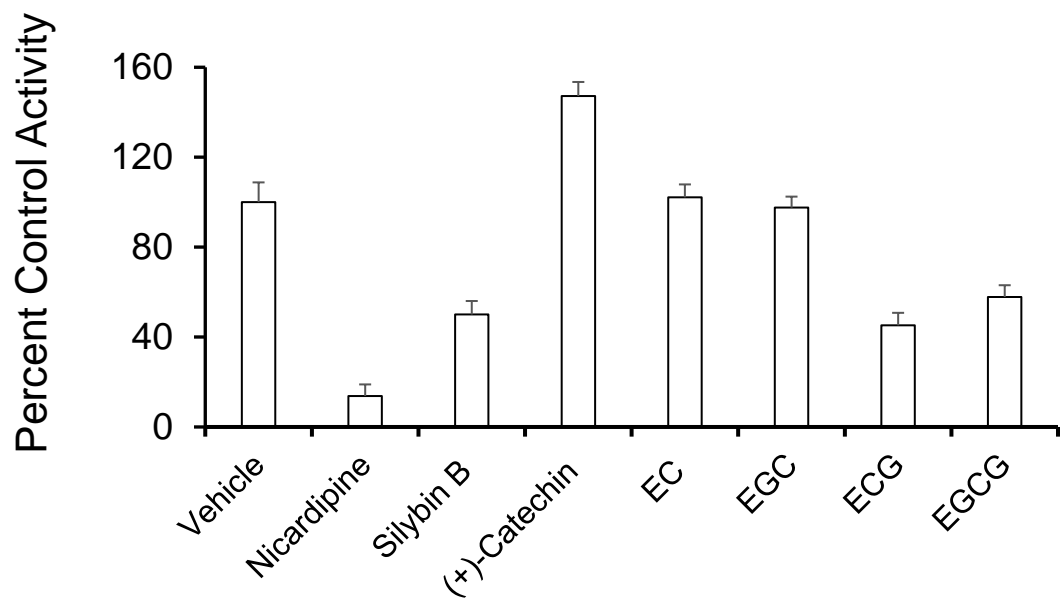

Fig. S2

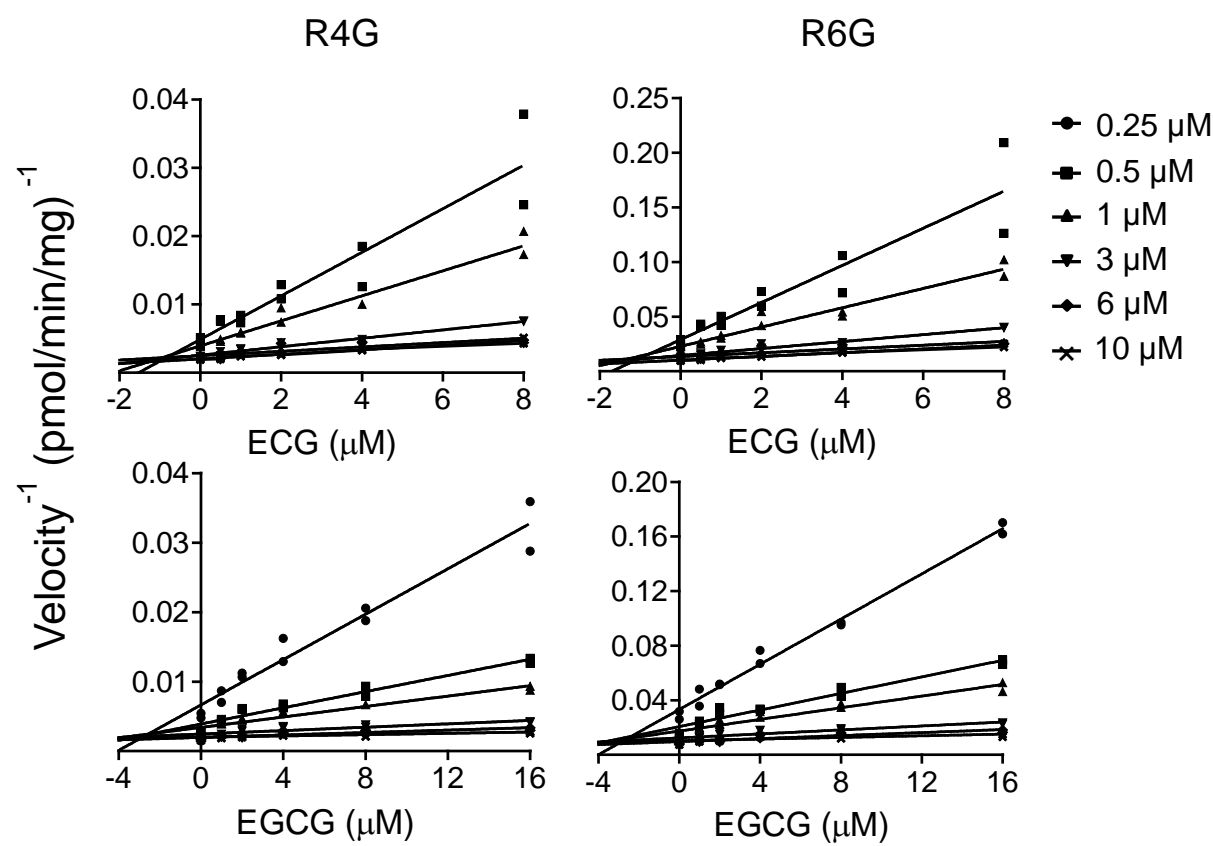

Fig. S3

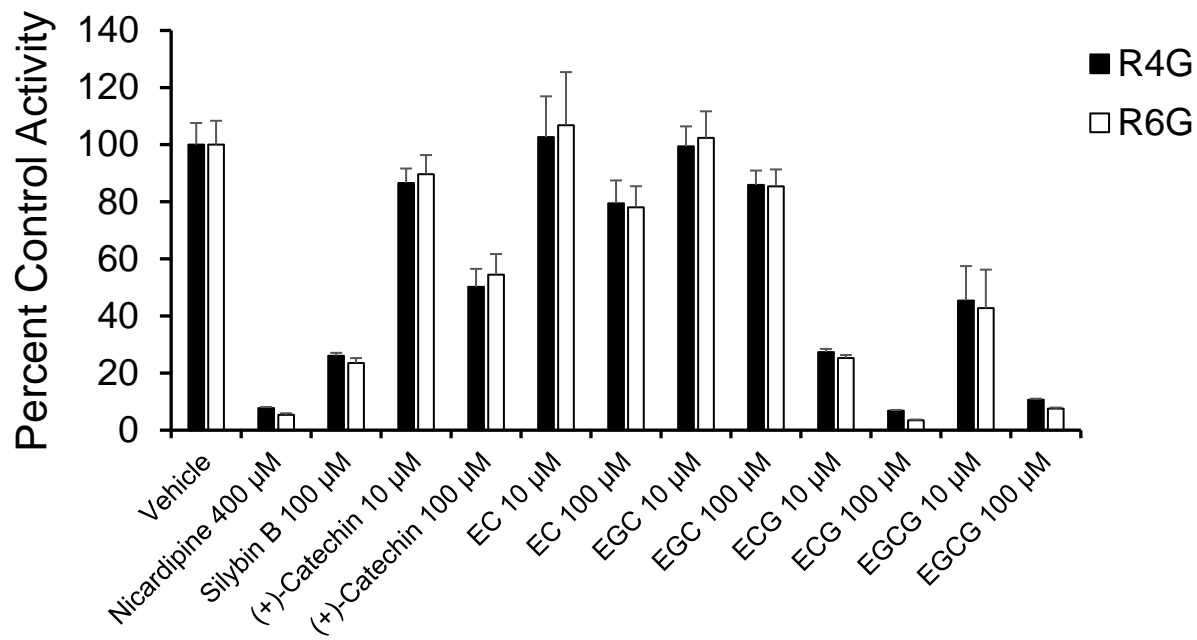

Supplement: Supplemental_79491.pdf [file Supplemental_79491.pdf]
